# Supplementary material
Source: PubMed Central journal article supplement (PMC8456364)
Supplement: NIHMS1694865-supplement-1.pdf [file NIHMS1694865-supplement-1.pdf]

**TABLE E1.** Overall demographic characteristics of study population by race/ethnicity, using survey weighting

| Characteristic                                    | Overall          | Non-Hispanic white | Non-Hispanic black | Hispanic         | Asian            |
|---------------------------------------------------|------------------|--------------------|--------------------|------------------|------------------|
| Total (percentage in weighted estimates)          | 116,428 (100%)   | 54,896 (59.1%)     | 18,352 (14.9%)     | 31,829 (20.8%)   | 7,571 (5.2%)     |
| Age (y), mean (SE of estimate)                    | 8.6 (0.02)       | 8.8 (0.03)         | 8.7 (0.05)         | 8.1 (0.03)       | 8.3 (0.08)       |
| % female (SE of estimate)                         | 49.0 (0.002)     | 48.7 (0.002)       | 49.5 (0.005)       | 48.6 (0.003)     | 49.8 (0.007)     |
| Nativity                                          |                  |                    |                    |                  |                  |
| Child born outside the United States, % (95% CI)  | 4.2 (4.0-4.3)    | 1.5 (1.4-1.6)      | 2.6 (2.3-3.0)      | 8.8 (8.3-9.2)    | 20.3 (19.1-21.7) |
| Parent born outside the United States, % (95% CI) | 21.5 (20.9-22.1) | 6.2 (5.9-6.6)      | 12.9 (11.9-14.0)   | 57.0 (55.9-58.1) | 76.9 (75.3-78.3) |
| Allergic disease                                  |                  |                    |                    |                  |                  |
| Food allergy, % (95% CI)                          | 5.4 (5.2-5.5)    | 5.5 (5.3-5.7)      | 5.9 (5.4-6.4)      | 4.3 (4.0-4.6)    | 6.2 (5.5-6.9)    |
| Eczema, % (95% CI)                                | 11.8 (11.5-12.0) | 11.2 (10.8-11.5)   | 16.8 (16.1-17.5)   | 9.7 (9.3-10.1)   | 11.8 (10.8-12.7) |
| Asthma, % (95% CI)                                | 9.0 (8.8-9.3)    | 8.0 (7.6-8.3)      | 15.3 (14.7-15.9)   | 8.2 (7.8-8.6)    | 5.7 (5.1-6.3)    |

Means and percentages are reported with SEs and 95% CIs of the weighted estimates because analyses were based on complex survey data.

**TABLE E2.** Stratified analyses by age category\*

| Variable                         | OR (95% CI)      |                  |                  |
|----------------------------------|------------------|------------------|------------------|
|                                  | Food allergy     | Eczema           | Asthma           |
| Stratified analysis by age, ≤5 y |                  |                  |                  |
| Race                             |                  |                  |                  |
| Non-Hispanic white               | Reference        | Reference        | Reference        |
| Non-Hispanic black               | 1.11 (0.94-1.31) | 1.86 (1.67-2.07) | 2.83 (2.40-3.34) |
| Hispanic                         | 0.77 (0.63-0.94) | 1.03 (0.91-1.15) | 1.48 (1.25-1.75) |
| Asian                            | 1.27 (1.00-1.61) | 1.47 (1.23-1.77) | 1.38 (1.03-1.84) |
| Nativity category                |                  |                  |                  |
| Child US-born                    | Reference        | Reference        | Reference        |
| Parent US-born                   |                  |                  |                  |
| Child US-born                    | 0.82 (0.67-0.98) | 0.64 (0.57-0.71) | 0.51 (0.43-0.60) |
| Parent foreign-born              |                  |                  |                  |
| Child foreign-born               | 0.58 (0.32-1.03) | 0.39 (0.25-0.57) | 0.39 (0.23-0.66) |
| Parent foreign-born              |                  |                  |                  |
| Child foreign-born               | 1.03 (0.44-2.37) | 0.69 (0.37-1.29) | 0.71 (0.33-1.51) |
| Parent US-born†                  |                  |                  |                  |

| Variable                                | OR (95% CI)      |                  |                  |
|-----------------------------------------|------------------|------------------|------------------|
|                                         | Food allergy     | Eczema           | Asthma           |
| Stratified analysis by age, ages 5-12 y |                  |                  |                  |
| Race                                    |                  |                  |                  |
| Non-Hispanic white                      | Reference        | Reference        | Reference        |
| Non-Hispanic black                      | 1.18 (0.99-1.39) | 1.64 (1.48-1.82) | 2.05 (1.84-2.28) |
| Hispanic                                | 0.83 (0.70-0.99) | 1.07 (0.96-1.20) | 1.32 (1.17-1.48) |
| Asian                                   | 1.26 (0.97-1.62) | 1.58 (1.30-1.91) | 1.31 (1.07-1.60) |
| Nativity category                       |                  |                  |                  |
| Child US-born                           | Reference        | Reference        | Reference        |
| Parent US-born                          |                  |                  |                  |
| Child US-born                           | 1.06 (0.91-1.23) | 0.68 (0.60-0.77) | 0.61 (0.55-0.69) |
| Parent foreign-born                     |                  |                  |                  |
| Child foreign-born                      | 0.72 (0.50-1.04) | 0.43 (0.33-0.55) | 0.26 (0.19-0.36) |
| Parent foreign-born                     |                  |                  |                  |
| Child foreign-born                      | 1.18 (0.72-1.93) | 0.68 (0.45-1.02) | 0.46 (0.27-0.79) |
| Parent US-born†                         |                  |                  |                  |

| Variable                                 | OR (95% CI)      |                  |                  |
|------------------------------------------|------------------|------------------|------------------|
|                                          | Food allergy     | Eczema           | Asthma           |
| Stratified analysis by age, ages 12-17 y |                  |                  |                  |
| Race                                     |                  |                  |                  |
| Non-Hispanic white                       | Reference        | Reference        | Reference        |
| Non-Hispanic black                       | 1.02 (0.86-1.21) | 1.37 (1.21-1.56) | 1.61 (1.32-1.61) |
| Hispanic                                 | 0.86 (0.70-1.05) | 0.98 (0.85-1.12) | 1.13 (0.99-1.30) |
| Asian                                    | 1.13 (0.82-1.55) | 1.29 (1.03-1.62) | 0.85 (0.66-1.08) |
| Nativity category                        |                  |                  |                  |
| Child US-born                            | Reference        | Reference        | Reference        |
| Parent US-born                           |                  |                  |                  |
| Child US-born                            | 0.93 (0.75-1.14) | 0.70 (0.61-0.82) | 0.61 (0.52-0.71) |
| Parent foreign-born                      |                  |                  |                  |
| Child foreign-born                       | 0.76 (0.57-1.00) | 0.47 (0.36-0.61) | 0.29 (0.22-0.38) |
| Parent foreign-born                      |                  |                  |                  |
| Child foreign-born                       | 1.11 (0.65-1.87) | 0.89 (0.57-1.38) | 0.90 (0.58-1.38) |
| Parent US-born†                          |                  |                  |                  |

\*Adjusted for age, sex, and income.

†Foreign-birth to US-born parents is a small group with likely varying backgrounds.

**TABLE E3.** Effect of nativity on odds of allergic diseases, stratified by race\*

| Nativity category   | OR (95% CI)      |                  |                  |
|---------------------|------------------|------------------|------------------|
|                     | Food allergy     | Eczema           | Asthma           |
| <b>Non-Asian</b>    |                  |                  |                  |
| Child US-born       | Reference        | Reference        | Reference        |
| Parent US-born      |                  |                  |                  |
| Child US-born       | 0.80 (0.73-0.88) | 0.64 (0.60-0.68) | 0.61 (0.57-0.66) |
| Parent foreign-born |                  |                  |                  |
| Child foreign-born  | 0.70 (0.56-0.87) | 0.46 (0.38-0.55) | 0.29 (0.24-0.36) |
| Parent foreign-born |                  |                  |                  |
| Child foreign-born  | 1.24 (0.88-1.77) | 0.76 (0.55-1.07) | 0.70 (0.50-0.98) |
| Parent US-born†     |                  |                  |                  |
| <b>Asian</b>        |                  |                  |                  |
| Child US-born       | Reference        | Reference        | Reference        |
| Parent US-born      |                  |                  |                  |
| Child US-born       | 1.18 (0.89-1.56) | 0.79 (0.63-0.98) | 0.70 (0.52-0.96) |
| Parent foreign-born |                  |                  |                  |
| Child foreign-born  | 0.61 (0.41-0.92) | 0.41 (0.29-0.59) | 0.30 (0.16-0.56) |
| Parent foreign-born |                  |                  |                  |
| Child foreign-born  | 1.01 (0.53-1.90) | 0.81 (0.46-1.44) | 0.73 (0.38-1.41) |
| Parent US-born†     |                  |                  |                  |

\*Adjusted for age, sex, and income.

†Foreign-birth to US-born parents is a small group with likely varying backgrounds.

**TABLE E4.** Overall demographic characteristics of Asian study population

| <b>Characteristic</b>                    | <b>Asian</b> | <b>Asian Indian</b> | <b>Chinese</b> | <b>Filipino</b> | <b>Other Asian</b> |
|------------------------------------------|--------------|---------------------|----------------|-----------------|--------------------|
| Total (percentage in weighted estimates) | 7571         | 1698 (24.4%)        | 1396 (18.8%)   | 1823 (22.2%)    | 2654 (34.6%)       |

**TABLE E5.** Effect of race on odds of allergic diseases,\* not adjusted for nativity

| Variable           | OR (95% CI)      |                  |                  |
|--------------------|------------------|------------------|------------------|
|                    | Food allergy     | Eczema           | Asthma           |
| Race               |                  |                  |                  |
| Non-Hispanic white | Reference        | Reference        | Reference        |
| Non-Hispanic black | 1.10 (1.00-1.22) | 1.62 (1.51-1.73) | 1.92 (1.79-2.06) |
| Hispanic           | 0.78 (0.71-0.85) | 0.84 (0.79-0.90) | 0.96 (0.89-1.03) |
| Asian              | 1.13 (0.98-1.29) | 1.05 (0.95-1.17) | 0.72 (0.63-0.81) |
| Age (y)            | 0.99 (0.99-1.00) | 0.97 (0.97-0.98) | 1.06 (1.05-1.06) |
| Sex: female        | 0.99 (0.93-1.06) | 1.03 (0.99-1.09) | 0.77 (0.73-0.82) |
| Income†            | 1.00 (0.96-1.05) | 1.00 (0.97-1.03) | 0.81 (0.78-0.84) |

\*Adjusted for age, sex, and income.

†Income-to-poverty ratio is an ordinal variable, with categories of  $\leq$ Federal Poverty Level, 1-2 times Federal Poverty Level,  $\geq$ 2 times Federal Poverty Level.
